# Supplementary material for: Insights into catalytic roles of noble-metal-free catalysts CoxSy for reduction of 4-nitrophenol
Source: Royal Society of Chemistry journal article supplement (doi:10.1039/c8cp05309j), 2018-01-01
Supplement: c8cp05309j1.pdf [file c8cp05309j1.pdf]

## Supporting Information

### Insights into catalytic roles of noble-metal-free catalysts $\text{Co}_x\text{S}_y$ for reduction of 4-nitrophenol

Rongmei Zhou,<sup>a</sup> Xiaoyan Yang,<sup>b</sup> Peng Zhang,<sup>a</sup> Lixia Yang,<sup>a</sup> Chengwei Liu,<sup>a</sup> Dan  
Liu,<sup>a\*</sup> Jianzhou Gui<sup>a\*</sup>

a. State Key Laboratory of Separation Membranes & Membrane Processes, and School of Environmental and Chemical Engineering, Tianjin Polytechnic University, Tianjin, 300387, P.R. China. Email: [danliu\\_939@hotmail.com](mailto:danliu_939@hotmail.com), [jzgui@hotmail.com](mailto:jzgui@hotmail.com).

b. School of Chemistry and Chemical Engineering, Shangqiu Normal University, Shangqiu 476000, China.

#### Preparations of Catalysts

$\text{Co}_9\text{S}_8$  catalyst was synthesized by a facile hydrothermal method. In a typical process, 0.2 mol of  $\text{Co}(\text{CH}_3\text{COO})_2 \cdot 4\text{H}_2\text{O}$  and 0.2 mol thiourea were dissolved into 40 mL deionized water, respectively. After being stirred for 30 min, the solution was transferred into a 50 mL Teflon lined stainless steel autoclave, sealed and maintained at 180°C for 24 h. After being cooled to room temperature, the black precipitate was centrifuged, washed three times with deionized water and ethanol, followed by drying at 60°C overnight. The as-prepared powder was calcined at 330°C for 1 h in  $\text{H}_2/\text{Ar}$  atmosphere to obtain  $\text{Co}_9\text{S}_8$  particles. Synthesis of CoS and  $\text{CoS}_2$  has been reported in previous works.<sup>1,2</sup>

Typically, dissolving  $\text{CoCl}_2 \cdot 6\text{H}_2\text{O}$  (2.5 mmol) into a mixture solution of deionized water (20 mL) and ethylene glycol (5 mL), and then thiourea (10 mmol) was added. After stirring for 10 min, the mixed solution was transferred into a 50 mL Teflon-lined stainless steel autoclave, and heated for 15 h at 180°C. Finally, the autoclave was cooled to room temperature, and the black powder of CoS was collected by centrifugation, washed several times with deionized water and ethanol, and dried for 12 h at 50°C under vacuum conditions.

The  $\text{Co}(\text{NO}_3)_2 \cdot 6\text{H}_2\text{O}$  (2 mmol) was firstly dissolved in 30 mL of deionized water to obtain solution A, and solution B was prepared by dissolving 2 mmol of L-cysteine in 30 mL of deionized water. After solution A was added into solution B under constant and vigorous stirring for 15 min, the resulting mixture was sealed in a Teflon-lined stainless steel autoclave, which was maintained at 190°C for 6 h, followed by cooling down to room temperature. Subsequently, the as-obtained  $\text{CoS}_2$  products were collected, completely washed, and dried at 60°C overnight.

## Characterizations

UV-vis absorption spectra were monitored by using a Thermo Fisher evolution 300 spectrophotometer.  $\text{N}_2$  adsorption-desorption isotherms were performed on Autosorb-iQ-C apparatus (Quantachrome Instruments). X-ray diffraction patterns (XRD) were recorded on a Rigaku D/max-2500PC apparatus with graphite monochromatized  $\text{Cu K}\alpha$  irradiation, operated at 40 kV and 200 mA in the  $2\theta$  range from 10° to 80°. Morphologies of samples were obtained by scanning electron microscope (SEM, Hitachi S4800). Surface chemical compositions of catalysts were analyzed by X-ray photoelectron spectroscopy (XPS, Thermo Fisher K-Aepra ESCA).  $\text{H}_2$ -temperature programmed desorption ( $\text{H}_2$ -TPD) was performed on a Micromeritics Auto Chem II 2920 apparatus, equipped with a thermal conductivity detector (TCD). Prior to the test, the catalysts were temperature programmed from room temperature to 200°C for 30 min in Ar (30 mL  $\text{min}^{-1}$ ). After cooling down to 40°C in Ar flow, the sample was adsorbed with 10%  $\text{H}_2/\text{Ar}$  (30 mL  $\text{min}^{-1}$ ) for 30 min. Subsequently,  $\text{H}_2$ -TPD was then carried out by increasing the temperature to 850°C with a ramp rate of 10°C  $\text{min}^{-1}$  in Ar flow.

The electrochemical impedance spectroscopy (EIS) were carried out in a standard three electrode system on a CHI 760E electrochemistry workstation (CH instruments, Chenhua Inc., Shanghai, China) in 0.5 M PBS buffer solution ( $\text{Na}_2\text{HPO}_4/\text{NaH}_2\text{PO}_4$ ) as an electrolyte, where platinum wire and Ag/AgCl were used as counter and reference electrodes. Work electrode was prepared as follow: 5 mg catalyst was ultrasonically dispersed in a mixture solution containing 400  $\mu\text{L}$  of

ethanol, 100  $\mu\text{L}$  of isopropanol and 20  $\mu\text{L}$  of 5 wt% Nafion, yielding a homogeneous ink. 10  $\mu\text{L}$  of the ink was loaded onto a glassy carbon electrode (GC, 3 mm in diameter, 0.071  $\text{cm}^2$ ) with a constant catalyst loading of 0.5 mg/mL. After fully dried at room temperature, the electrode was finally used as the working electrode. The EIS tests were scanned from 0.1 Hz to 100 kHz at 1.5 V with AC amplitude of 5 mV.

### **Catalytic experiments**

Reduction of p-NP to p-AP by excess  $\text{NaBH}_4$  was carried out at room temperature in a standard 4 mL quartz cell. Typically, 2.5 mL of fresh  $\text{NaBH}_4$  (0.01 M) was added into 25  $\mu\text{L}$  of 4-NP aqueous solution (0.01 M) in the quartz cell. Then, 5 mg catalyst was added into the above solution quickly to start the reaction, and the absorption spectra in scanning range of 200-500 nm were monitored by UV-vis spectrophotometer at a 1.5 min interval. After 3 min of reaction time, the catalyst was separated from the reaction solution with a magnet, thoroughly washed with deionized water and ethanol, and then dried at 60°C overnight. The recovered catalyst was used for the next cycling reaction to investigate its reusability and stability.

1. H. Yang, J. Zha, P. Zhang, Y. Xiong, L. Su and F. Ye., *RSC Adv.*, 2016, **6**, 66963-66970.
2. J. Jin, X. Zhang and T. He., *J. Phys. Chem. C*, 2014, **118**, 24877-24883.

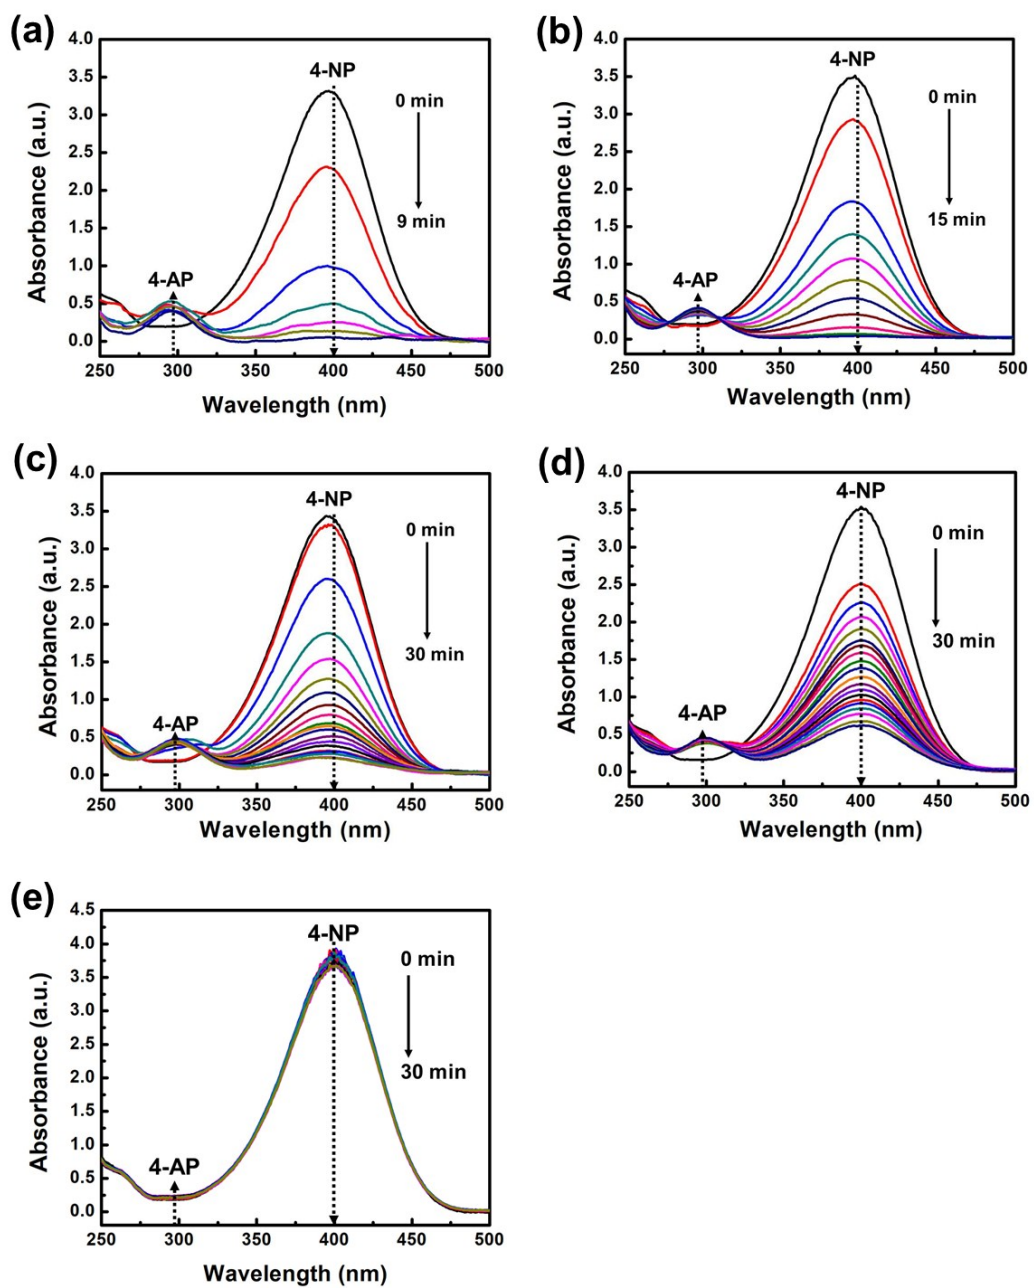

**Fig. S1** Time-dependent UV-Vis spectra of 4-NP catalyzed by CoS (a), CoS<sub>2</sub> (b), Co<sub>3</sub>O<sub>4</sub>(c), commercial CoS (d), and no catalyst (e).

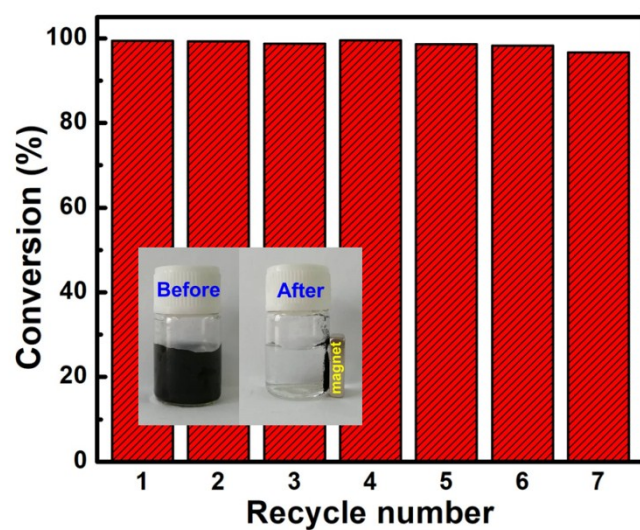

**Fig. S2** Cycling activity of  $\text{Co}_9\text{S}_8$  for 4-NP reduction (5 mg catalyst, 2.5 mL of fresh  $\text{NaBH}_4$  (0.01 M), and 25  $\mu\text{L}$  of 4-NP aqueous solution (0.01 M). Reaction time is 3 min. Inset shows separated process of  $\text{Co}_9\text{S}_8$  using a magnet.

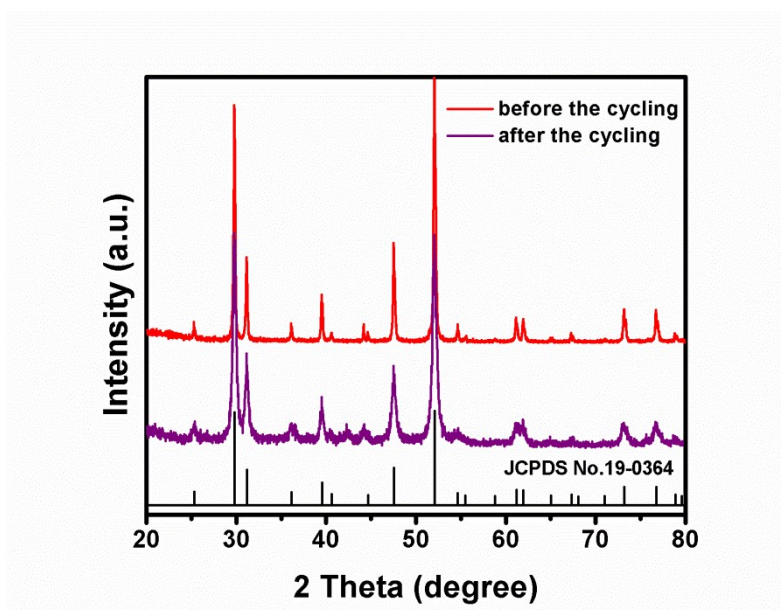

**Fig. S3** XRD patterns of  $\text{Co}_9\text{S}_8$  before and after the cycling.

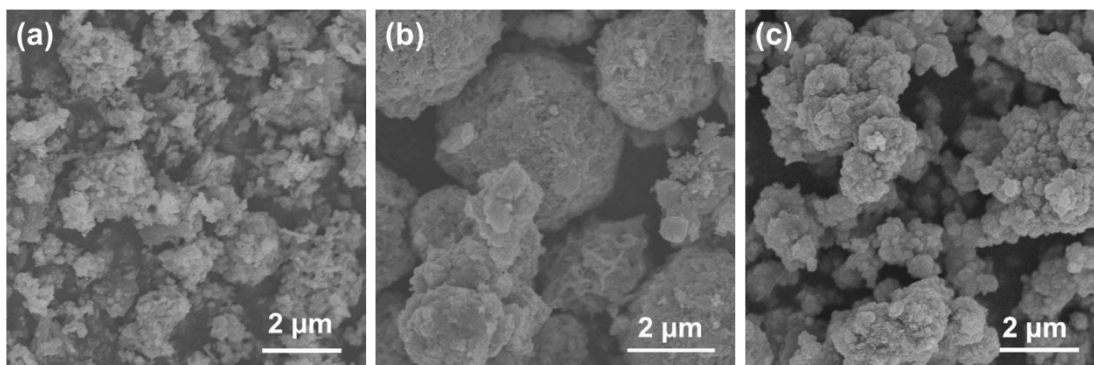

Fig. S4 SEM images of  $\text{Co}_9\text{S}_8$  (a),  $\text{CoS}$  (b) and  $\text{CoS}_2$  (c).

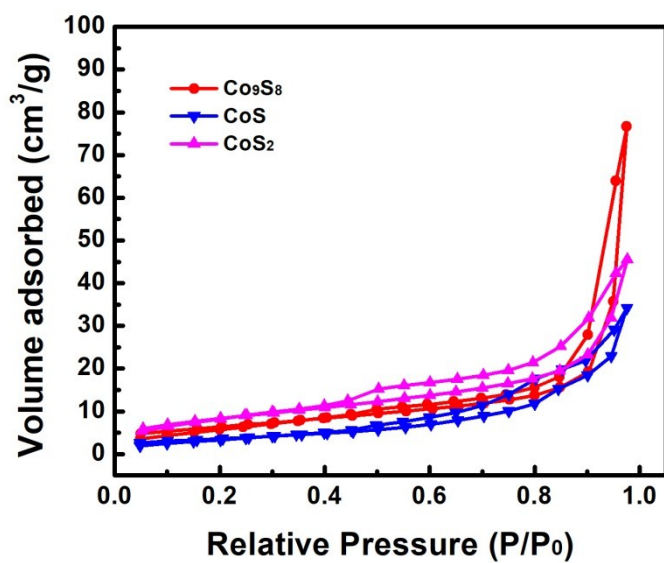

Fig. S5  $\text{N}_2$  adsorption-desorption isotherms of the  $\text{Co}_9\text{S}_8$ ,  $\text{CoS}$  and  $\text{CoS}_2$ .

Table S1 Binding energy of Co 2p and S 2p.

| Sample                  | Binding energy (eV) |                  |                 |                   |
|-------------------------|---------------------|------------------|-----------------|-------------------|
|                         | $\text{Co}^{3+}$    | $\text{Co}^{2+}$ | $\text{S}^{2-}$ | $\text{S}_2^{2-}$ |
| $\text{Co}_9\text{S}_8$ | 778.4               | 780.7            | 161.5           | -                 |
|                         | 793.1               | 796.5            | 162.6           | -                 |
| $\text{CoS}$            | -                   | 778.1            | 161.5           | -                 |
|                         | -                   | 793.1            | 162.6           | -                 |
| $\text{CoS}_2$          | -                   | 778.1            | -               | 162.8             |
|                         | -                   | 793.4            | -               | 163.9             |
